# Supplementary material for: Saiga horn user characteristics, motivations, and purchasing behaviour in Singapore
Source: PLOS journal article supplement (doi:10.1371/journal.pone.0222038), 2019-09-10
Supplement: S5 (10.1371/journal.pone.0222038.s005) [file journal.pone.0222038.s005]

# Supporting Information

## Saiga horn user characteristics, motivations, and purchasing behaviour in Singapore

Doughty et al. 2019

### S2 File: Buyers of Any Treatment

When comparing saiga buyers to buyers of any treatment type for others we found that the two groups were fairly similar in gender and age, but that for this larger buyer group, education was positively related to buying for others, and religion was not a variable of importance. Buyers for Others was composed of participants who buy any treatment type for others to treat heatiness and/or fever (1196 respondents). Statistical Analysis: GLM dredge and average, with sum contrasts applied.

A priori hypotheses:

| Variable   | Effect Y/N | Hypothesis                               |
|------------|------------|------------------------------------------|
|            |            | Direction of Effect                      |
| Age        | Y          | Middle-age more likely to buy for others |
| Education  | N          | No difference between education levels   |
| Religion   | N          | No difference between religions          |
| Gender     | Y          | Females more likely to buy for others    |
| Dialect    | N          | No difference between dialect groups     |
| Income     | N          | No difference between income levels      |
| Generation | N          | No difference between generations        |

Model selection table:

|    | (Intrc) | age | education | gender | generation | df | logLik    | AICc   | delta | weight |
|----|---------|-----|-----------|--------|------------|----|-----------|--------|-------|--------|
| 30 | -0.1592 | +   | +         | +      | +          | 12 | -1462.081 | 2948.3 | 0     | 0.858  |
| 14 | -0.208  | +   | +         | +      |            | 8  | -1467.918 | 2951.9 | 3.6   | 0.142  |

Relative variable importance:

|             | age | education | gender | generation |
|-------------|-----|-----------|--------|------------|
| Importance: | 1   | 1         | 1      | 0.86       |

Model-averaged coefficients:

| (full average)  | Estimate | Std. Error | Adjusted SE | z value | Pr(> z ) | P-value• | Likelihood ^ |
|-----------------|----------|------------|-------------|---------|----------|----------|--------------|
| (Intercept)     | -0.16611 | 0.07641    | 0.07645     | 2.173   | 0.0298   | *        |              |
| young           | -0.66039 | 0.07525    | 0.07529     | 8.771   | < 2e-16  | ***      | negative     |
| mid-age         | 0.68968  | 0.06431    | 0.06434     | 10.719  | < 2e-16  | ***      | positive     |
| old             | -0.02929 | 0.07747    | 0.07751     | 0.378   | 0.7056   |          | neutral      |
| primary         | -0.24929 | 0.11241    | 0.11247     | 2.216   | 0.0267   | *        | negative     |
| secondary-ite   | 0.07054  | 0.08957    | 0.08962     | 0.787   | 0.4312   |          | neutral      |
| preuni-postsec  | 0.09932  | 0.09399    | 0.09404     | 1.056   | 0.29091  |          | neutral      |
| uni-grad        | 0.58744  | 0.09979    | 0.09984     | 5.884   | < 2e-16  | ***      | positive     |
| unknown edu     | -0.50801 | 0.16583    | 0.16592     | 3.062   | 0.0022   | **       | negative     |
| female          | 0.36633  | 0.08888    | 0.08893     | 4.119   | 3.80E-05 | ***      | positive     |
| male            | -0.36633 | 0.08888    | 0.08893     | 4.119   | 3.80E-05 | ***      | negative     |
| first           | -0.02194 | 0.08805    | 0.0881      | 0.249   | 0.8034   |          | neutral      |
| second          | -0.11389 | 0.08785    | 0.08789     | 1.296   | 0.195    |          | neutral      |
| third           | 0.13688  | 0.10411    | 0.10415     | 1.314   | 0.18873  |          | neutral      |
| more than third | 0.26325  | 0.17849    | 0.17855     | 1.474   | 0.1404   |          | neutral      |
| unknown gen     | -0.26431 | 0.17674    | 0.1768      | 1.495   | 0.1349   |          | neutral      |

•Signif. codes: 0 '\*\*\*' 0.001 '\*\*' 0.01 '\*' 0.05 '.' 0.1 ' ' 1

^Direction of likelihood of being a saiga user at this level of confidence
